# Supplementary material for: Insights into an Autologous Dendritic Cells Vaccine for Glioblastoma: First Step Results from a Phase II Study (CombiG-Vax)
Source: Preprints.org preprint supplement (doi:10.20944/preprints202312.2138.v1), 2023-12-28
Supplement: Supplementary file 2 [file supplementary]

Archive with 3 entries (3 files):
- Supplementary/191.05_Prot_Eme1.0_17.02.22.pdf
- Supplementary/IB_DCvax_v.1.6_21.04.21.pdf
- Supplementary/IMPD_DCvax_v.1.9_21.04.21.pdf
